# Supplementary material for: L-Theanine Administration Modulates the Absorption of Dietary Nutrients and Expression of Transporters and Receptors in the Intestinal Mucosa of Rats
Source: Biomed Res Int. 2017 Jul 24;2017:9747256. doi: 10.1155/2017/9747256 (PMC5546063; doi:10.1155/2017/9747256)
Supplement: Supplementary file 1 — Effects of L-Theanine administration on serum amino acids profiles in rat. [file 9747256.f1.docx]

**TABLE1: Effects of L-Theanine on serum amino acids profiles (μmol/L).**

| Item1 | Treatments(mg/kg BW·d) | | | |  | *P* value2 | |
| --- | --- | --- | --- | --- | --- | --- | --- |
| 0 | 50 | 200 | 400 |  | Linear | Quadratic |
| Thr | 148.29 ±10.89b | 179.83±10.25a | 165.78±9.61ab | 107.78±11.37c |  | ** | ** |
| Val | 112.28 ±8.13a | 129.01±7.66a | 114.27±7.18a | 73.41±8.13b |  | *** | * |
| Met | 28.36±1.83a | 32.00±1.72a | 29.96±1.62a | 18.22±1.95b |  | *** | ** |
| Ile | 76.45± 5.74a | 86.44±5.40a | 76.97±5.06a | 46.62±5.74b |  | *** | * |
| Phe | 42.46±3.77ab | 53.20±3.55a | 47.53±3.33a | 32.52±4.02b |  | ** | * |
| Lys | 213.94±20.36b | 284.15±17.98a | 240.55±16.86ab | 155.54±19.10c |  | ** | * |
| His | 28.78±2.92b | 42.37±2.77a | 41.07±2.42a | 29.68±2.74b |  | NS | ** |
| Tau | 118.57± 1.00a | 134.90±10.64a | 119.78±1.00a | 101.22± 1.00ab |  | NS | NS |
| Ser | 156.66±10.47a | 182.39±9.86a | 166.39±9.24a | 109.59±10.94b |  | ** | ** |
| Gly | 170.86±14.27ab | 202.50±13.43a | 200.62±13.11a | 133.85±14.27b |  | * | ** |
| Ala | 260.85± 20.10a | 304.78±18.92a | 261.97±17.74a | 163.19±20.10b |  | *** | NS |
| Pro | 381.09 ±37.12a | 426.78±30.74a | 435.74±29.21a | 275.23±31.79b |  | ** | ** |
| Cit | 53.45± 3.60a | 51.76 ±3.39a | 50.62 ±3.18a | 30.09± 3.60b |  | *** | * |
| Tyr | 53.43± 3.81a | 47.86±3.59a | 47.72±3.36a | 31.77±3.98b |  | ** | NS |
| Orn | 34.29±2.64a | 32.61±2.48a | 32.54±2.33a | 27.62±2.81a |  | NS | NS |
| Asp | 22.01± 2.68b | 32.02± 2.53a | 31.21± 2.37a | 19.15±2.97b |  | NS | ** |
| Asn | 46.96±5.73a | 59.44± 5.54a | 56.88±5.06a | 30.01±6.35b |  | * | ** |
| Glu | 87.81± 4.89b | 106.19±4.53a | 91.91± 4.13a | 73.28 ± 6.47c |  | * | NS |
| Gln | 1753±108.61b | 2137±102.25a | 2194±95.87a | 2155 ±150.06a |  | * | NS |
| Leu | 98.34±7.61a | 114.79±7.16a | 98.37±6.72a | 65.72±7.61b |  | ** | * |
| Arg | 103.22±7.46a | 122.83± 7.02a | 109.86±6.58a | 61.81±7.46b |  | *** | ** |

1 Cited by Tong et al.(2016).

2*, *P*<0.05, **, *P*<0.01, ***, *P*<0.001, NS: not significant.
